# Supplementary material
Source: publisher figshare collection journal article supplement (https://sage.figshare.com/ndownloader/files/14549492)
Supplement: Supplementary file 1 [file 14549492]

## ***Supplementary Material***

# **Altered social cognition and connectivity of default mode networks in the co-occurrence of autistic spectrum disorder and attention deficit hyperactivity disorder**

Kai Wang<sup>1,2,#</sup>, Mingyu Xu<sup>2,#</sup>, Yiting Ji<sup>2</sup>, Lingli Zhang<sup>1,2</sup>, Xiujuan Du<sup>2</sup>, Jijun Li<sup>6</sup>, Qiang Luo<sup>4,5,\*</sup> and Fei Li<sup>2,3,\*</sup>

### **Affiliations:**

<sup>1</sup>Shanghai Children's Medical Center, Shanghai Jiao Tong University School of Medicine, Shanghai 200127, PR China.

<sup>2</sup>Developmental and Behavioral Pediatric Department & Child Primary Care Department, MOE-Shanghai Key Laboratory for Children's Environmental Health, Xinhua Hospital, Shanghai Jiao Tong University School of Medicine, Shanghai 200092, PR China.

<sup>3</sup>Shanghai Institute of Pediatric Research, Xinhua Hospital, Shanghai Jiao Tong University School of Medicine, Shanghai 200092, PR China.

<sup>4</sup>Institute of Science and Technology for Brain-Inspired Intelligence, Fudan University, Shanghai, China and Key Laboratory of Computational Neuroscience and Brain-Inspired Intelligence (Fudan University), Ministry of Education, China.

<sup>5</sup>School of Life Sciences and State Key Laboratory of Genetic Engineering, Fudan University, Shanghai, PR China.

<sup>6</sup>Department of Integrative Medicine on Pediatrics, Shanghai Children's Medical Center, Shanghai Jiao Tong University School of Medicine, Shanghai 200127, PR China.

# These authors contributed equally to this work.

\*Shared corresponding authors

**The first author:**

Name: Kai Wang

Address: Shanghai Children's Medical Center, Shanghai Jiao Tong University School of Medicine, Developmental and Behavioral Pediatric Department & Child Primary Care Department, MOE-Shanghai Key Laboratory for Children's Environmental Health, Xinhua Hospital, Shanghai Jiao Tong University School of Medicine, Shanghai 200127, PR China.

Tel: +86 13127961150

E-mail: [wangkai8815@sjtu.edu.cn](mailto:wangkai8815@sjtu.edu.cn)

**The co-first author:**

Name: Mingyu Xu

Address: Developmental and Behavioral Pediatric Department & Child Primary Care Department,  
MOE-Shanghai Key Laboratory for Children's Environmental Health, Xinhua Hospital, Shanghai  
Jiao Tong University School of Medicine, Shanghai 200127, PR China.

Tel: +86 13817511696

E-mail: [xumingyu@xinhuaamed.com.cn](mailto:xumingyu@xinhuaamed.com.cn)

**Corresponding authors:**

Professor Fei Li, M.D, Ph.D.

Developmental and Behavioral Pediatric Department & Child Primary Care Department, Brain and  
Behavioral Research Unit of Shanghai Institute for Pediatric Research & MOE-Shanghai Key  
Laboratory for Children's Environmental Health, Xinhua Hospital, Shanghai Jiao Tong University  
School of Medicine, Shanghai Institute of Pediatric Research, Xinhua Hospital, Shanghai Jiao Tong  
University School of Medicine, Shanghai 200092, PR China.

Tel. +86-21-25077470

Email: [feili@shsmu.edu.cn](mailto:feili@shsmu.edu.cn)

Associated Principal Investigator Qiang Luo, Ph.D.

Institute of Science and Technology for Brain-Inspired Intelligence, Fudan University, Shanghai,  
China and Key Laboratory of Computational Neuroscience and Brain-Inspired Intelligence (Fudan  
University), Ministry of Education, China.

Tel. +86-21-65648454

Email: [qluo@fudan.edu.cn](mailto:qluo@fudan.edu.cn)

## Supplemental Materials

**Sample selection: Diagnosis of ASD**As reported in the ABIDE website, [http://fcon\\_1000.projects.nitrc.org/indi/abide](http://fcon_1000.projects.nitrc.org/indi/abide) II /, the diagnosis of ASD was supported by as the Autism Diagnostic Observation Schedule (ADOS) and the Autism Diagnostic Interview-Revised (ADI-R) in 5/7 Sites, often combined with clinical judgment based on expertise and DSM-IV-TR diagnostic criteria. The Social Responsiveness Scale (SRS), Child Behavior Checklist (CBCL) and Social Communication Questionnaire (SCQ) were also administered to an informant known to the participant in 1/7 Sites. Details of image acquisition for each site can be found on the ABIDE website [http://fcon\\_1000.projects.nitrc.org/indi/abide](http://fcon_1000.projects.nitrc.org/indi/abide) II /.

## Additional analyses on the significant connectivity findings with site

We further analyzed the associations between the significant connectivity in each site with our finding in the all sample. For the results of the intra-iFC, regardless of the statistical significance, the tendency of results within each site except for the UCD\_1 site in which included 12 ASD (including 3 ASD\_coADHD and 9 ASD\_nonADHD) is consistent with our existing results, controlling for age and sex. For the results of the inter-iFC, except for the sites of EMC\_1(including 7 ASD\_coADHD and 8 ASD\_nonADHD) and IP\_1 (including 5 ASD\_coADHD and 3 ASD\_nonADHD), the tendency of results within each of other 5 sites is consistent with our existing results. In summary, our results are relatively stable. Besides, we tested the differences across the sites by using ANOVA in each group, controlling for age and sex. We found that the significant connectivity had no significant differences across the sites in the ASD\_coADHD group (intra-iFC:  $F=1.927$ ,  $P=0.088$ ; inter-iFC:  $F=1.945$   $P=0.085$ ), but in the ASD\_nonADHD and TD group, the differences were significant ( $P_s<0.05$ ).

## Additional analyses on the significant connectivity findings with age

Data from various studies suggest that a crucial distinctive feature underlying ASD–ADHD subtypes may be the differential developmental patterns, we divided the sample into three groups (childhood group: age<12, n=256; adolescence group: 12≤age<18, n=55; adulthood group: age≥18, n=29) according to age (5.1-35.6). Due to the small sample size of the adulthood group (8.55% of all sample, only 5 ASD\_coADHD included), we focused our analysis on the adolescence and childhood groups. First, we tested the associations between the significant connectivity in adolescence group with our finding in the all sample, the tendency of results within adolescence group was consistent with our existing results. However, we had not detected the associations between the significant connectivity and autistic traits measured by ADI-R social scale, of which the reason we think was the sample size. Next, we tried to describe the development patterns of the significant connectivity in three groups, but because of the mismatch of sample size among the three groups (1: childhood group; 2: adolescence group; 3: adulthood group), the results may need more evidence to support in the future. The development patterns (from childhood to adolescence) of the ASD\_coADHD group (red lines) was different from the ASD\_nonADHD (blue lines) and TD groups (black lines) for the intra-iFC within the R.PCC (Supplementary Figure 3A), but not for the intra-iFC within the L.PCC (Supplementary Figure 3B) and the inter-iFC (Supplementary Figure 3C). These results might partly explain the crucial distinctive feature underlying ASD–ADHD subtypes. For the results of the intra-iFC (Supplementary Figure 3A and B), we can find that the significant connectivity of the adolescence group can be more easily to distinguish the ASD\_coADHD and ASD\_nonADHD groups compared to the childhood group. This may add the evidence for the view that adolescence which may after childhood be a second crucial time window mentioned in the review.

## Supplementary Figures

**Supplementary Figure 1.** Data were selected from the ABIDE II database([http://fcon\\_1000.projects.nitrc.org/indi/abide/abide\\_II](http://fcon_1000.projects.nitrc.org/indi/abide/abide_II)). Specifically, we selected the participants for this analysis from the sites that featured all the basic inclusion criteria, described in the top two steps of the flowchart: NYU\_1, NYU\_2, KKI\_1, UCD\_1, IP\_1, KUL\_3, EMC\_1. Additional

information about the final sample are reported in Table 1 in the main text, and in supplementary Table 1.

**Supplementary Figure 2.** 23 rs-fMRI networks extracted by the independent component analysis.

**Supplementary Figure 3.** The development patterns of the significant connectivity in three groups.

**A:** The development patterns of the intra-iFC of the right posterior cingulate cortex (PCC). **B:** The development patterns of the intra-iFC of the left posterior cingulate cortex (PCC). **C:** The development patterns of the inter-iFC between DMN and Somatomotor network.

## Supplementary Tables

### Supplementary Table 2

#### Participants demographics

|                | All sample          |                     |
|----------------|---------------------|---------------------|
|                | Mean(SD)[Range]     |                     |
|                | Autism Group(N=162) | TD Group(N=177)     |
| Age, year      | 11.0(4.9)[5.1-26.6] | 11.0(4.0)[5.9-35.6] |
| Performance IQ | 105.5(16.2)[61-149] | 106.1(11.2)[71-125] |

| <b>Gender</b>                                     | male(N=135) female(N=27) | male(N=133) female(N=44) |
|---------------------------------------------------|--------------------------|--------------------------|
| <b>ADI_R_social</b>                               | 18.1(6.3)[0-29]          | N/A                      |
| <b>(N<sub>ASD</sub> =113; N<sub>TD</sub>=0)</b>   |                          |                          |
| <b>SRS</b>                                        | 74.4(14.0)[42-113]       | 43.6(5.4)[34-65]         |
| <b>(N<sub>ASD</sub> =113; N<sub>TD</sub>=140)</b> |                          |                          |

Abbreviations: SD= standard deviation; ADI-R= Autism Diagnostic Interview-Revised; SRS: social responsiveness scale;

Participants from the following sites from ABIDE II were included in the final sample of 339 participants: NYU\_1, NYU\_2,

KKI\_1, UCD\_1, IP\_1, KUL\_3, EMC\_1.

## Supplementary Table 2

### The scan parameters and diagnostics of ASD in 7 sites

| Site                                   | NYU_1                | NYU_2            | KKI_1                       | UCD_1      | IP_1             | KUL_3                        | EMC_1                     |
|----------------------------------------|----------------------|------------------|-----------------------------|------------|------------------|------------------------------|---------------------------|
| Diagnostics and Phenotypic Assessments | ADOS                 | ADOS             | ADOS-G                      | ADOS-G     | ADOS             | DSM-IV-TR                    | SRS CBCL                  |
|                                        | ADI-R                | ADI-R            | and/or ADI-R                | SCQ        | ADI-R            |                              | SCQ                       |
| Site location                          | New York,<br>USA     | New York,<br>USA | Baltimore,<br>Maryland, USA | Davis, USA | Paris,<br>France | Leuven, Flanders,<br>Belgium | Rotterdam,<br>Netherlands |
| Eyes status                            | open                 | open             | open                        | open       | closed           | open                         | closed                    |
| Number of Measurements ( n )           | 180                  | 180              | 156                         | 151        | 85               | 162                          | 160                       |
| The scan<br>parameters                 | TR (ms)              | 2000             | 2000                        | 2500       | 2000             | 2700                         | 2500                      |
|                                        | TE (ms)              | 30               | 15                          | 30         | 24               | 45                           | 30                        |
|                                        | Number of Slices (n) | 34               | 33                          | 47         | 36               | 32                           | 45                        |
|                                        |                      |                  |                             |            |                  |                              |                           |

---

|                             |   |   |   |   |   |     |   |
|-----------------------------|---|---|---|---|---|-----|---|
| <b>Slice thickness (mm)</b> | 3 | 3 | 3 | 4 | 4 | 2.7 | 4 |
|-----------------------------|---|---|---|---|---|-----|---|

---

Abbreviations: NYU\_1: NYU Langone Medical Center: Sample 1; NYU\_2: NYU Langone Medical Center: Sample 2; KKI: Kennedy Krieger Institute; UCD: University of California Davis; IP: Institut Pasteur and Robert Debré Hospital; KUL: Katholieke Universiteit Leuven; EMC: Erasmus University Medical Center Rotterdam; ADOS: Autism Diagnostic Observation Schedule ; ADI-R= Autism Diagnostic Interview-Revised; SRS: social responsiveness scale; CBCL: Child Behavior Checklist; SCQ: Social Communication Questionnaire; TR: Repetition Time; TE: Echo Time.

### Supplementary Table 3

#### Altered Intra-network Functional Connectivity in Patients with ASD as Compared to TD

| Inter-iFC    | ASD (SD)     | TD (SD)       | t      | <i>p</i> uncorrected | <i>q</i> FDR corrected |
|--------------|--------------|---------------|--------|----------------------|------------------------|
| IC 2-IC 8    | 0.098(0.242) | 0.172(0.243)  | -2.776 | 0.006                | 0.047*                 |
| IC 2-IC 13   | 0.032(0.239) | 0.123(0.239)  | -3.511 | <0.001               | 0.011*                 |
| IC 3-IC 13   | 0.055(0.264) | 0.137(0.284)  | -2.745 | 0.006                | 0.048*                 |
| IC 4- IC 7   | 0.484(0.303) | 0.582(0.300)  | -2.999 | 0.003                | 0.032*                 |
| IC 4- IC 13  | 0.030(0.245) | 0.144(0.289)  | -3.896 | <0.001               | 0.004*                 |
| IC 7- IC 17  | 0.366(0.257) | 0.228(0.272)  | 4.769  | <0.001               | <0.001*                |
| IC 9- IC 11  | 0.480(0.354) | 0.369(0.312)  | 3.050  | 0.002                | 0.032*                 |
| IC 9- IC 13  | 0.051(0.265) | 0.138(0.274)  | -2.981 | 0.003                | 0.032*                 |
| IC 9- IC 18  | 0.296(0.364) | 0.152(0.319)  | 3.882  | <0.001               | 0.004*                 |
| IC 11- IC 13 | 0.031(0.268) | 0.132(0.291)  | -3.311 | 0.001                | 0.018*                 |
| IC 11- IC 18 | 0.462(0.336) | 0.360(0.330)  | 2.813  | 0.005                | 0.045*                 |
| IC 17- IC 18 | 0.029(0.294) | -0.081(0.252) | 3.713  | <0.001               | 0.006*                 |
| IC 17- IC 22 | 0.046(0.275) | -0.045(0.254) | 3.160  | 0.002                | 0.026*                 |
| IC 17- IC 23 | 0.328(0.239) | 0.247(0.270)  | 2.941  | 0.003                | 0.033*                 |

Abbreviations: Inter-iFC: functional connectivity between networks; IC= independent component; SD= standard deviation; ASD = Autism Spectrum Disorder; TD= Typical development.

\*Significant at  $q < .05$  after FDR correction.
